# Supplementary material for: Individual Patterns and Temporal Trajectories of Changes in Fear and Pain during Exposure In Vivo: A Multiple Single-Case Experimental Design in Patients with Chronic Pain
Source: MDPI journal article supplement (doi:10.3390/jcm11051360), 2022-03-01
Supplement: s1 [file s1]

*Article*

# Individual Patterns and Temporal Trajectories of Changes in Fear and Pain during Exposure In Vivo: A Multiple Single-Case Experimental Design in Patients with Chronic Pain

Jente Bontinck <sup>1,2</sup>, Marlies den Hollander <sup>3,4</sup>, Amanda L. Kaas <sup>5</sup>, Jeroen R. De Jong <sup>3,6</sup> and Inge Timmers <sup>2,3,\*</sup>

## Supplementary tables

Table S1: Multilevel modelling results of the pre-post EXP comparison;

Table S2; Individual regression results per week for pain-related fear;

Table S3; Individual regression results per week for pain intensity;

Table S4A-C: results of non-daily questionnaires;

Table S5; Moderating factors in multilevel pre-post model.

**Table S1.** Multilevel modelling results of the pre-post EXP comparisons.

| Fixed effects               | Pain-related fear (SD) | Pain intensity (SD) |
|-----------------------------|------------------------|---------------------|
| Intercept <sup>(1)</sup>    | 53.17 (6.71)***        | 42.65 (5.17)***     |
| Time <sup>(2)</sup>         | -0.39 (0.11)**         | -0.16 (0.10)        |
| Phase <sup>(3)</sup>        | -29.44 (7.30)***       | -9.28 (2.61)**      |
| Time x phase <sup>(4)</sup> | 0.34 (0.33)            | 0.24 (0.29)         |

\* =  $p < 0.05$ ; \*\* =  $p < 0.01$ ; \*\*\* =  $p < 0.001$ ; 1 = mean baseline level; 2 = mean change in baseline phase; 3 = mean pre-post treatment effect; 4 = mean slope in post-treatment phase; SD = standard deviation.

**Table S2.** Individual regression results per week for pain-related fear.

| Case | Pre / post          | Week 1  | Week 2  | Week 3  | Week 4  | Week 5               | Week 6               | Week 7               | Week 8               | Week 9              | Week 10 | Week 11 | Week 12 | Week 13 | Week 14 | Week 15 | Week 16 |
|------|---------------------|---------|---------|---------|---------|----------------------|----------------------|----------------------|----------------------|---------------------|---------|---------|---------|---------|---------|---------|---------|
| C01  | < .001*             | 0.01*   | < .001* | < .001* | < .001* | < .001*              | 0.015*               | 0.901                | 0.005*               | < .001*             | < .001* | < .001* | 0.233   | < .001* | < .001* | 0.486   | 0.486   |
| C02  | < .001*             | 0.344   | < .001* | < .001* | < .001* | < .001*              | < .001*              | < .001*              | < .001*              | < .001*             | < .001* | 0.003*  | 0.719   | 0.94    | -       | -       | -       |
| C03  | 0.001* <sup>1</sup> | < .001* | < .001* | < .001* | < .001* | < .001* <sup>1</sup> | < .001* <sup>1</sup> | < .001* <sup>1</sup> | < .001* <sup>1</sup> | 0.003* <sup>1</sup> | 0.055   | 0.116   | 0.868   | 0.559   | 0.559   | -       | -       |
| C04  | < .001*             | 0.204   | 0.078*  | < .001* | < .001* | < .001*              | < .001*              | < .001*              | < .001*              | 0.112               | 0.112   | 0.425   | 0.435   | -       | -       | -       | -       |
| C05  | < .001*             | 0.596   | 0.017*  | 0.703   | 0.647   | -                    | -                    | -                    | -                    | -                   | -       | -       | -       | -       | -       | -       | -       |
| C06  | < .001*             | < .001* | < .001* | 0.049*  | 0.938   | 0.255                | 0.069                | -                    | -                    | -                   | -       | -       | -       | -       | -       | -       | -       |
| C07  | 0.028*              | 0.018*  | 0.008*  | 0.381   | 0.842   | 0.415                | 0.295                | 0.751                | 0.757                | -                   | -       | -       | -       | -       | -       | -       | -       |
| C08  | 0.911               | 0.985   | 0.001*  | 0.001*  | 0.001*  | 0.141                | 0.683                | -                    | -                    | -                   | -       | -       | -       | -       | -       | -       | -       |
| C09  | < .001*             | < .001* | < .001* | 0.587   | 0.105   | 0.421                | 0.942                | -                    | -                    | -                   | -       | -       | -       | -       | -       | -       | -       |
| C10  | < .001*             | < .001* | < .001* | < .001* | < .001* | < .001*              | < .001*              | < .001*              | 0.03*                | 0.819               | 0.819   | -       | -       | -       | -       | -       | -       |
| C11  | 0.005*              | 0.403   | 0.221   | 0.304   | 0.62    | 0.041*               | 0.176                | 0.589                | -                    | -                   | -       | -       | -       | -       | -       | -       | -       |
| C12  | 0.383               | 0.346   | 0.107   | 0.097   | 0.027*  | 0.009*               | 0.024*               | 0.013*               | -                    | -                   | -       | -       | -       | -       | -       | -       | -       |
| C13  | < .001*             | 0.672   | < .001* | < .001* | < .001* | 0.004*               | 0.025*               | 0.098                | 0.364                | 0.946               | -       | -       | -       | -       | -       | -       | -       |
| C14  | 0.001*              | 0.991   | 0.037*  | 0.073   | 0.556   | 0.151                | 0.294                | 0.933                | -                    | -                   | -       | -       | -       | -       | -       | -       | -       |
| C15  | 0.182               | 0.001*  | 0.006*  | < .001* | < .001* | 0.012*               | 0.001*               | < .001*              | < .001*              | < .001*             | 0.002*  | 0.024*  | 0.292   | 0.614   | -       | -       | -       |
| C16  | < .001*             | 0.979   | 0.149   | 0.55    | 0.644   | 0.259                | 0.263                | 0.561                | 0.822                | -                   | -       | -       | -       | -       | -       | -       | -       |
| C17  | < .001*             | 0.812   | 0.963   | 0.55    | 0.014*  | < .001*              | < .001*              | < .001*              | < .001*              | 0.001*              | 0.067   | 0.073   | 0.486   | 0.645   | -       | -       | -       |
| C18  | 0.21                | < .001* | < .001* | < .001* | < .001* | < .001*              | 0.034*               | 0.17                 | 0.608                | -                   | -       | -       | -       | -       | -       | -       | -       |
| C19  | 0.518               | 0.28    | 0.014*  | 0.043*  | 0.007*  | 0.448                | 0.858                | 0.107                | -                    | -                   | -       | -       | -       | -       | -       | -       | -       |
| C20  | 0.653               | 0.554   | 0.51    | 0.71    | 0.052   | 0.992                | 0.278                | 0.841                | 0.536                | -                   | -       | -       | -       | -       | -       | -       | -       |

\* = p-value < 0.05; <sup>1</sup> = increase instead of reduction.

**Table S3.** Individual regression results per week for pain intensity.

| Case | Pre / post          | Week 1              | Week 2              | Week 3              | Week 4              | Week 5  | Week 6  | Week 7  | Week 8  | Week 9  | Week 10 | Week 11 | Week 12 | Week 13 | Week 14 | Week 15 | Week 16 |
|------|---------------------|---------------------|---------------------|---------------------|---------------------|---------|---------|---------|---------|---------|---------|---------|---------|---------|---------|---------|---------|
| C01  | < .001*             | 0.026*              | < .001*             | < .001*             | < .001*             | < .001* | < .001* | < .001* | < .001* | < .001* | < .001* | 0.002*  | 0.233   | 0.524   | 0.818   | 0.913   | 0.913   |
| C02  | 0.005*              | 0.003*              | < .001*             | < .001*             | < .001*             | 0.005*  | 0.016*  | 0.099   | 0.777   | 0.134   | 0.115   | 0.082   | 0.491   | 0.592   | -       | -       | -       |
| C03  | 0.503               | 0.031*              | 0.067               | 0.716               | 0.6                 | 0.451   | 0.319   | 0.513   | 0.275   | 0.38    | 0.619   | 0.722   | 0.868   | 0.952   | 0.952   | -       | -       |
| C04  | < .001*             | 0.072               | 0.001*              | 0.004*              | 0.003*              | 0.034   | 0.794   | 0.03*   | 0.03*   | 0.15    | 0.15    | 0.366   | 0.435   | -       | -       | -       | -       |
| C05  | 0.43                | 0.56                | 0.798               | 0.609               | 0.963               | -       | -       | -       | -       | -       | -       | -       | -       | -       | -       | -       | -       |
| C06  | 0.447               | 0.831               | 0.851               | 0.618               | 0.015*              | 0.786   | 0.393   | -       | -       | -       | -       | -       | -       | -       | -       | -       | -       |
| C07  | 0.076*              | 0.665               | 0.899               | 0.714               | 0.638               | 0.878   | 0.597   | 0.382   | 0.052   | -       | -       | -       | -       | -       | -       | -       | -       |
| C08  | 0.125               | 0.104               | 0.811               | 0.998               | 0.779               | 0.68    | 0.114   | -       | -       | -       | -       | -       | -       | -       | -       | -       | -       |
| C09  | 0.528               | 0.02*               | 0.099               | 0.68                | 0.614               | 0.428   | 0.84    | -       | -       | -       | -       | -       | -       | -       | -       | -       | -       |
| C10  | 0.961               | < .001*             | < .001*             | < .001*             | < .001*             | < .001* | 0.005*  | 0.274   | 0.214   | 0.986   | 0.986   | -       | -       | -       | -       | -       | -       |
| C11  | 0.014*              | 0.463               | 0.054               | 0.26                | 0.989               | 0.052   | 0.458   | 0.455   | -       | -       | -       | -       | -       | -       | -       | -       | -       |
| C12  | 0.756               | 0.528               | 0.202               | 0.492               | 0.763               | < .001* | 0.001*  | 0.013*  | -       | -       | -       | -       | -       | -       | -       | -       | -       |
| C13  | 0.059               | 0.027*              | 0.004*              | < .001*             | < .001*             | 0.002*  | 0.081   | 0.36    | 0.706   | 0.364   | -       | -       | -       | -       | -       | -       | -       |
| C14  | 0.083               | 0.697               | 0.388               | 0.299               | 0.406               | 0.439   | 0.094   | 0.681   | -       | -       | -       | -       | -       | -       | -       | -       | -       |
| C15  | 0.071               | 0.003*              | 0.165               | 0.884               | 0.754               | 0.067   | 0.009*  | 0.001*  | 0.072   | 0.709   | 0.146   | 0.038*  | 0.292   | 0.068   | -       | -       | -       |
| C16  | 0.372               | 0.022*              | < .001*             | < .001*             | < .001*             | < .001* | 0.003*  | 0.149   | 0.718   | -       | -       | -       | -       | -       | -       | -       | -       |
| C17  | 0.512               | < .001*             | 0.839               | 0.696               | 0.631               | 0.659   | 0.891   | 0.779   | 0.745   | 0.699   | 0.043   | 0.352   | 0.486   | 0.529   | -       | -       | -       |
| C18  | 0.961               | 0.114               | 0.21                | 0.583               | 0.516               | 0.001*  | 0.018*  | 0.061   | 0.707   | -       | -       | -       | -       | -       | -       | -       | -       |
| C19  | 0.92                | 0.241               | 0.075               | 0.008               | 0.002*              | 0.124   | 0.109   | 0.344   | -       | -       | -       | -       | -       | -       | -       | -       | -       |
| C20  | 0.006* <sup>1</sup> | 0.051* <sup>1</sup> | 0.012* <sup>1</sup> | 0.025* <sup>1</sup> | 0.016* <sup>1</sup> | 0.425   | 0.578   | 0.812   | 0.61    | -       | -       | -       | -       | -       | -       | -       | -       |

\* = p-value < 0.05; <sup>1</sup> = increase instead of reduction.

**Table S4A.** Results of non-daily questionnaires.

| Pre-EXP vs post-EXP | Mean (SD)      | SE   | 95% CI        | t-value | p-value |
|---------------------|----------------|------|---------------|---------|---------|
| Average pain        | -1.64 (2.16)   | .48  | .63 – 2.64    | 3.40    | .003*   |
| PDI                 | -27.40 (15.36) | 3.43 | 20.21 – 34.59 | 7.98    | < .001* |
| PHODA               | -33.32 (22.69) | 5.07 | 22.71–43.95   | 6.57    | < .001* |
| TSK                 | -10.65 (7.39)  | 1.65 | 7.19 – 14.11  | 6.45    | < .001* |
| HADS                | -2.35 (7.17)   | 1.60 | -1.01 – 5.71  | 1.47    | .159    |
| PCS                 | -12.40 (13.08) | 2.92 | 6.28 - 18.52  | 4.24    | < .001* |
| PVAQ                | -13.75 (16.57) | 3.70 | 5.99 – 21.51  | 3.71    | .001*   |
| SFMPQ               | -5.40 (6.48)   | 1.45 | 2.37 – 8.43   | 3.73    | .001*   |
| RS                  | -7.10 (7.45)   | 1.67 | 3.61 – 10.59  | 4.26    | < .001* |

\* = p-value &lt; 0.05.

**Table S4B.** Results of non-daily questionnaires.

| Case             | Average pain score |            |            |            | PDI         |             |             |            | PHODA       |             |              |            | TSK         |             |             |            | HADS angst + depressive |            |            |             |
|------------------|--------------------|------------|------------|------------|-------------|-------------|-------------|------------|-------------|-------------|--------------|------------|-------------|-------------|-------------|------------|-------------------------|------------|------------|-------------|
|                  | PRE                | POST       | DIFF       | %          | PRE         | POST        | DIFF        | %          | PRE         | POST        | DIFF         | %          | PRE         | POST        | DIFF        | %          | PRE                     | POST       | DIFF       | %           |
| <b>CLUSTER 1</b> | <b>4.5</b>         | <b>2.1</b> | <b>2.0</b> | <b>48%</b> | <b>37.1</b> | <b>4.3</b>  | <b>32.9</b> | <b>85%</b> | <b>53.6</b> | <b>6.2</b>  | <b>47.4</b>  | <b>88%</b> | <b>35.1</b> | <b>24.9</b> | <b>10.3</b> | <b>27%</b> | <b>6.3</b>              | <b>4.9</b> | <b>1.4</b> | <b>-</b>    |
| C01              | 3.4                | 0          | 3.4        | 100%       | 34          | 0           | 34          | 100%       | 45          | 0.1         | 45.0         | 100%       | 27          | 25          | 2           | 7%         | 0                       | 1          | -1         | -           |
| C02              | 6.2                | 5          | 1.2        | 19%        | 28          | 10          | 18          | 64%        | 49.43       | 18.9        | 30.6         | 62%        | 26          | 23          | 3           | 12%        | 0                       | 13         | -13        | -           |
| C04              | 7                  | 3.8        | 3.2        | 46%        | 57          | 0           | 57          | 100%       | 73          | 0.4         | 72.6         | 99%        | 39          | 29          | 10          | 26%        | 0                       | 3          | -3         | -           |
| C07              | 3.4                | 2          | 1.4        | 41%        | 41          | 6           | 35          | 85%        | 40.3        | 0.0         | 40.3         | 100%       | 26          | 21          | 5           | 19%        | 18                      | 2          | 16         | 89%         |
| C10              | 3.2                | 3.2        | 0          | 0%         | 39          | 7           | 32          | 82%        | 65.4        | 9.5         | 55.9         | 85%        | 39          | 18          | 21          | 54%        | 5                       | 6          | -1         | -20%        |
| C14              | 3                  | 0.4        | 2.6        | 87%        | 19          | 7           | 12          | 63%        | 54          | 7.4         | 46.6         | 86%        | 51          | 37          | 14          | 27%        | 11                      | 6          | 5          | 45%         |
| C15              | 5.6                | 3.2        | 2.4        | 43%        | 42          | 0           | 42          | 100%       | 48          | 6.9         | 41.1         | 86%        | 38          | 21          | 17          | 45%        | 10                      | 3          | 7          | 70%         |
| <b>CLUSTER 2</b> | <b>4.8</b>         | <b>3.2</b> | <b>1.6</b> | <b>26%</b> | <b>30.6</b> | <b>11.4</b> | <b>19.2</b> | <b>63%</b> | <b>42.9</b> | <b>12.4</b> | <b>30.5</b>  | <b>82%</b> | <b>38.8</b> | <b>27.2</b> | <b>11.6</b> | <b>29%</b> | <b>10.4</b>             | <b>9.2</b> | <b>1.2</b> | <b>5%</b>   |
| C05              | 4                  | 2.2        | 1.8        | 45%        | 7           | 4           | 3           | 43%        | 18.3        | 0.9         | 17.4         | 95%        | 36          | 32          | 4           | 11%        | 7                       | 10         | -3         | -43%        |
| C06              | 4                  | 6.6        | -2.6       | -65%       | 48          | 9           | 39          | 81%        | 43.4        | 0.0         | 43.4         | 100%       | 46          | 21          | 25          | 54%        | 4                       | 4          | 0          | 0%          |
| C09              | 5                  | 0          | 5          | 100%       | 19          | 0           | 19          | 100%       | 28.2        | 0.0         | 28.2         | 100%       | 42          | 29          | 13          | 31%        | 10                      | 6          | 4          | 40%         |
| C13              | 3.8                | 3          | 0.8        | 21%        | 35          | 15          | 20          | 57%        | 40.6        | 9.0         | 31.6         | 78%        | 37          | 30          | 7           | 19%        | 21                      | 17         | 4          | 19%         |
| C17              | 7                  | 4          | 3          | 43%        | 44          | 29          | 15          | 34%        | 83.9        | 52.1        | 31.8         | 38%        | 33          | 24          | 9           | 27%        | 10                      | 9          | 1          | 10%         |
| <b>CLUSTER 3</b> | <b>4.9</b>         | <b>2.5</b> | <b>2.4</b> | <b>26%</b> | <b>46.7</b> | <b>9.3</b>  | <b>37.3</b> | <b>80%</b> | <b>59</b>   | <b>9.78</b> | <b>49.20</b> | <b>84%</b> | <b>46</b>   | <b>34.3</b> | <b>11.7</b> | <b>23%</b> | <b>14.3</b>             | <b>4.7</b> | <b>9.7</b> | <b>59%</b>  |
| C08              | 7.6                | 6.8        | 0.8        | 11%        | 45          | 7           | 38          | 84%        | 71.2        | 20.0        | 51.2         | 72%        | 32          | 29          | 3           | 9%         | 8                       | 5          | 3          | 38%         |
| C11              | 7.2                | 0.8        | 6.4        | 89%        | 38          | 9           | 29          | 76%        | 35.4        | 3.8         | 31.6         | 89%        | 44          | 30          | 14          | 32%        | 23                      | 4          | 19         | 83%         |
| C16              | 0                  | 0          | 0          | 0%         | 57          | 12          | 45          | 79%        | 70.4        | 5.5         | 64.9         | 92%        | 62          | 44          | 18          | 29%        | 12                      | 5          | 7          | 58%         |
| <b>CLUSTER 4</b> | <b>5.8</b>         | <b>5.1</b> | <b>0.7</b> | <b>21%</b> | <b>42.4</b> | <b>20.4</b> | <b>22</b>   | <b>51%</b> | <b>47.5</b> | <b>40.5</b> | <b>6.9</b>   | <b>33%</b> | <b>36.8</b> | <b>27.2</b> | <b>9.6</b>  | <b>24%</b> | <b>9.8</b>              | <b>9.4</b> | <b>0.4</b> | <b>-23%</b> |
| C03              | 2.8                | 0          | 2.8        | 100%       | 50          | 0           | 50          | 100%       | 61.3        | 93.6        | -32.3        | -53%       | 50          | 25          | 25          | 50%        | 14                      | 7          | 7          | 50%         |
| C12              | 5.2                | 7.8        | -2.6       | -50%       | 49          | 25          | 24          | 49%        | 71.2        | 52.7        | 18.6         | 26%        | 40          | 35          | 5           | 13%        | 11                      | 15         | -4         | -36%        |
| C18              | 6.2                | 5.4        | 0.8        | 13%        | 35          | 10          | 25          | 71%        | 7.2         | 0.4         | 6.9          | 95%        | 23          | 18          | 5           | 22%        | 1                       | 2          | -1         | -100%       |
| C19              | 7.8                | 6.4        | 1.4        | 18%        | 49          | 47          | 2           | 4%         | 72.2        | 46.4        | 25.8         | 36%        | 36          | 27          | 9           | 25%        | 15                      | 10         | 5          | 33%         |
| C20              | 7                  | 6          | 1          | 14%        | 29          | 20          | 9           | 31%        | 25.3        | 9.65        | 15.6         | 62%        | 35          | 31          | 4           | 11%        | 8                       | 13         | -5         | -63%        |
| <b>TOTAL</b>     | <b>5</b>           | <b>3.3</b> | <b>1.6</b> | <b>34%</b> | <b>38.3</b> | <b>10.9</b> | <b>27.4</b> | <b>70%</b> | <b>50.2</b> | <b>16.9</b> | <b>33.3</b>  | <b>72%</b> | <b>38.1</b> | <b>27.5</b> | <b>10.7</b> | <b>26%</b> | <b>9.4</b>              | <b>7.1</b> | <b>2.3</b> | <b>-</b>    |

Pre = baseline results; Post = post-treatment results; Diff = improvement by treatment; % = percentage improvement by treatment.

**Table S4C.** Results of non-daily questionnaires.

| Case             | PCS         |             |             |            | PVAQ        |             |             |            | SFMPQ        |             |            |            | RS          |             |             |            |
|------------------|-------------|-------------|-------------|------------|-------------|-------------|-------------|------------|--------------|-------------|------------|------------|-------------|-------------|-------------|------------|
|                  | PRE         | POST        | DIFF        | %          | PRE         | POST        | DIFF        | %          | PRE          | POST        | DIFF       | %          | PRE         | POST        | DIFF        | %          |
| <b>CLUSTER 1</b> | <b>15</b>   | <b>4.9</b>  | <b>10.1</b> | <b>48%</b> | <b>43</b>   | <b>23</b>   | <b>20</b>   | <b>43%</b> | <b>15.1</b>  | <b>9.7</b>  | <b>5.4</b> | <b>28%</b> | <b>47.9</b> | <b>36</b>   | <b>11.9</b> | <b>24%</b> |
| C01              | 12          | 0           | 12          | 100%       | 37          | 34          | 3           | 8%         | 12           | 1           | 11         | 92%        | 49          | 35          | 14          | 29%        |
| C02              | 12          | 4           | 8           | 67%        | 32          | 19          | 13          | 41%        | 14           | 14          | 0          | 0%         | 43          | 30          | 13          | 30%        |
| C04              | 30          | 0           | 30          | 100%       | 62          | 3           | 59          | 95%        | 19           | 3           | 16         | 84%        | 51          | 28          | 23          | 45%        |
| C07              | 26          | 3           | 23          | 88%        | 43          | 9           | 34          | 79%        | 19           | 20          | -1         | -5%        | 51          | 36          | 15          | 29%        |
| C10              | 3           | 5           | -2          | -67%       | 31          | 17          | 14          | 45%        | 7            | 12          | -5         | -71%       | 44          | 42          | 2           | 5%         |
| C14              | 15          | 21          | -6          | -40%       | 39          | 33          | 6           | 15%        | 13           | 6           | 7          | 54%        | 57          | 46          | 11          | 19%        |
| C15              | 7           | 1           | 6           | 86%        | 57          | 46          | 11          | 19%        | 22           | 12          | 10         | 45%        | 40          | 35          | 5           | 13%        |
| <b>CLUSTER 2</b> | <b>23.8</b> | <b>6.8</b>  | <b>17</b>   | <b>55%</b> | <b>41.4</b> | <b>28.8</b> | <b>12.6</b> | <b>25%</b> | <b>16.8</b>  | <b>13.4</b> | <b>3.4</b> | <b>18%</b> | <b>46</b>   | <b>40.6</b> | <b>5.4</b>  | <b>10%</b> |
| C05              | 12          | 16          | -4          | -33%       | 33          | 37          | -4          | -12%       | 12           | 10          | 2          | 17%        | 43          | 38          | 5           | 12%        |
| C06              | 32          | 2           | 30          | 94%        | 39          | 18          | 21          | 54%        | 18           | 14          | 4          | 22%        | 41          | 33          | 8           | 20%        |
| C09              | 39          | 0           | 39          | 100%       | 55          | 10          | 45          | 82%        | 13           | 13          | 0          | 0%         | 39          | 28          | 11          | 28%        |
| C13              | 21          | 10          | 11          | 52%        | 38          | 42          | -4          | -11%       | 22           | 15          | 7          | 32%        | 56          | 53          | 3           | 5%         |
| C17              | 15          | 6           | 9           | 60%        | 42          | 37          | 5           | 12%        | 19           | 15          | 4          | 21%        | 51          | 51          | 0           | 0%         |
| <b>CLUSTER 3</b> | <b>23</b>   | <b>12</b>   | <b>11</b>   | <b>61%</b> | <b>25</b>   | <b>21</b>   | <b>4</b>    | <b>19%</b> | <b>18.33</b> | <b>8.7</b>  | <b>9.7</b> | <b>58%</b> | <b>51</b>   | <b>41.7</b> | <b>9.3</b>  | <b>5%</b>  |
| C08              | 4           | 0           | 4           | 100%       | 25          | 16          | 9           | 36%        | 15           | 4           | 11         | 73%        | 33          | 33          | 0           | 0%         |
| C11              | 35          | 6           | 29          | 83%        | 21          | 13          | 8           | 38%        | 16           | 3           | 13         | 81%        | 66          | 50          | 16          | 24%        |
| C16              | 30          | 30          | 0           | 0%         | 29          | 34          | -5          | -17%       | 24           | 19          | 5          | 21%        | 54          | 42          | 12          | 22%        |
| <b>CLUSTER 4</b> | <b>22</b>   | <b>10.2</b> | <b>11.8</b> | <b>54%</b> | <b>39.4</b> | <b>27.4</b> | <b>12</b>   | <b>31%</b> | <b>19</b>    | <b>14.2</b> | <b>4.8</b> | <b>22%</b> | <b>45.8</b> | <b>45</b>   | <b>0.8</b>  | <b>3%</b>  |
| C03              | 32          | 18          | 14          | 44%        | 37          | 15          | 22          | 59%        | 17           | 0           | 17         | 100%       | 35          | 38          | -3          | -9%        |
| C12              | 16          | 18          | -2          | -13%       | 60          | 55          | 5           | 8%         | 14           | 21          | -7         | -50%       | 48          | 54          | -6          | -13%       |
| C18              | 7           | 1           | 6           | 86%        | 29          | 19          | 10          | 34%        | 16           | 15          | 1          | 6%         | 51          | 46          | 5           | 10%        |
| C19              | 35          | 10          | 25          | 71%        | 42          | 19          | 23          | 55%        | 26           | 18          | 8          | 31%        | 52          | 42          | 10          | 19%        |
| C20              | 20          | 4           | 16          | 80%        | 29          | 29          | 0           | 0%         | 22           | 17          | 5          | 23%        | 43          | 45          | -2          | -5%        |
| <b>TOTAAL</b>    | <b>20.2</b> | <b>7.8</b>  | <b>12.4</b> | <b>53%</b> | <b>39</b>   | <b>25.3</b> | <b>13.8</b> | <b>32%</b> | <b>17</b>    | <b>11.6</b> | <b>5.4</b> | <b>29%</b> | <b>47.4</b> | <b>40.3</b> | <b>7.1</b>  | <b>14%</b> |

Pre = baseline results; Post = post-treatment results; Diff = improvement by treatment; % = percentage improvement by treatment.

**Table S5.** Moderating factors in multilevel pre-post model.

|               | Fixed effects                 | Pain-related fear (SD) | Pain intensity (SD) |             | Fixed effects                 | Pain-related fear (SD) | Pain intensity (SD) |              | Fixed effects                 | Pain-related fear (SD) | Pain intensity (SD) |
|---------------|-------------------------------|------------------------|---------------------|-------------|-------------------------------|------------------------|---------------------|--------------|-------------------------------|------------------------|---------------------|
| <b>Gender</b> | Factor <sup>(1)</sup>         | -23.29 (10.01)*        | 7.36 (8.77)         | <b>PDI</b>  | Factor <sup>(1)</sup>         | 0.95 (0.38)*           | 0.34 (0.33)         | <b>PVAQ</b>  | Factor <sup>(1)</sup>         | 0.39 (0.45)            | 0.10 (0.36)         |
|               | Phase x factor <sup>(2)</sup> | 37.17 (10.26)**        | 2.53 (5.62)         |             | Phase x factor <sup>(2)</sup> | 0.17 (0.52)            | -0.11 (0.21)        |              | Phase x factor <sup>(2)</sup> | -0.24 (0.54)           | -0.27 (0.22)        |
| <b>Age</b>    | Factor <sup>(1)</sup>         | 0.74 (0.44)            | -0.20 (0.37)        | <b>TSK</b>  | Factor <sup>(1)</sup>         | 0.77 (0.57)            | -0.52 (0.45)        | <b>SFMPQ</b> | Factor <sup>(1)</sup>         | 0.62 (1.20)            | 0.30 (0.94)         |
|               | Phase x factor <sup>(2)</sup> | -0.14 (0.56)           | -0.17 (0.23)        |             |                               | -0.21 (0.70)           | -0.51 (0.27)        |              | Phase x factor <sup>(2)</sup> | 0.73 (1.41)            | 0.22 (0.60)         |
| <b>Group</b>  | Factor <sup>(1)</sup>         | 4.44 (11.70)           | -13.47 (8.62)       | <b>PCS</b>  | Factor <sup>(1)</sup>         | 0.58 (0.46)            | -0.01 (0.38)        | <b>RS</b>    | Factor <sup>(1)</sup>         | -0.23 (0.56)           | -0.23 (0.56)        |
|               | Phase x factor <sup>(2)</sup> | -5.26 (13.78)          | -5.33 (5.66)        |             | Phase x factor <sup>(2)</sup> | -0.07 (0.57)           | 0.09 (0.24)         |              | Phase x factor <sup>(2)</sup> | 0.13 (0.35)            | 0.13 (0.35)         |
| <b>PHODA</b>  | Factor <sup>(1)</sup>         | 0.78 (0.20)*           | 0.21 (0.21)         | <b>HADS</b> | Factor <sup>(1)</sup>         | 0.32 (0.85)            | -0.24 (0.66)        |              |                               |                        |                     |
|               | Phase x factor <sup>(2)</sup> | 0.09 (0.32)            | -0.17 (0.13)        |             | Phase x factor <sup>(2)</sup> | 0.87 (0.98)            | -0.41 (0.40)        |              |                               |                        |                     |

\* =  $p < 0.05$ ; \*\* =  $p < 0.01$ ; \*\*\* =  $p < 0.001$ ; 1 = influence of factor on baseline scores; 2 = influence of factor on treatment effect; HADS = Hospital Anxiety and Depression Scale; PCS = Pain Catastrophizing Scale; PDI = Pain Disability Index; PHODA = Photographs series of Daily Activities; PVAQ = Pain Vigilance and Awareness Questionnaire; RS = Resilience Scale; SD = standard deviation; SFMPQ = Short-Form McGill Pain Questionnaire; TSK = Tampa Scale for Kinesiophobia.
